# Supplementary material for: Investigation of the Bimodal Leaching Response of RAM Chip Gold Fingers in Ammonia Thiosulfate Solution
Source: MDPI journal article supplement (doi:10.3390/ma16144940), 2023-07-11
Supplement: s1 [file s1]

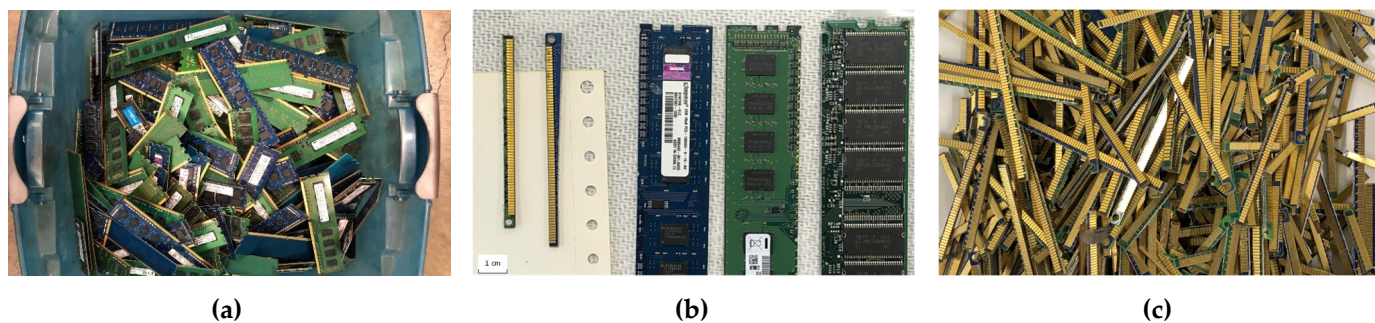

**Figure S1.** (a) As-received RAM chips, (b) stamped Au-fingers and remaining boards, (c) as-stamped untreated Au-fingers.

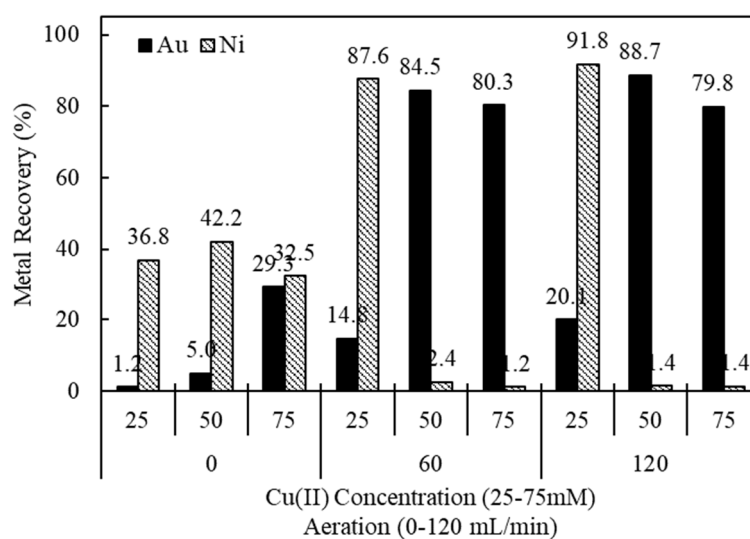

**Figure S2.** Recovery of Au and Ni at copper concentrations of 25 mM, 50mM, and 75 mM at the aeration rates of 0 mL/min, 60 mL/min, and 120 mL/min at 240 min (summary of Experiment 2–10).

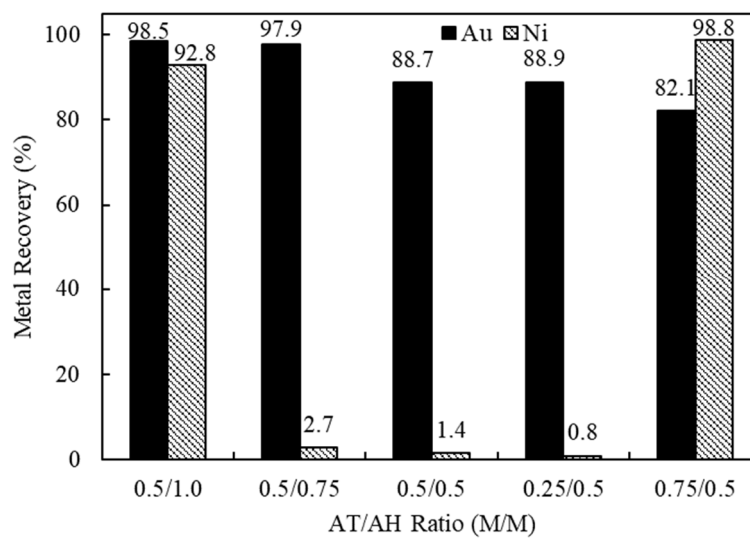

**Figure S3.** Effect of ratio of ammonium thiosulfate to ammonium hydroxide on recovery of Au and Ni at 240 min (summary of Experiment 9, 11–14).

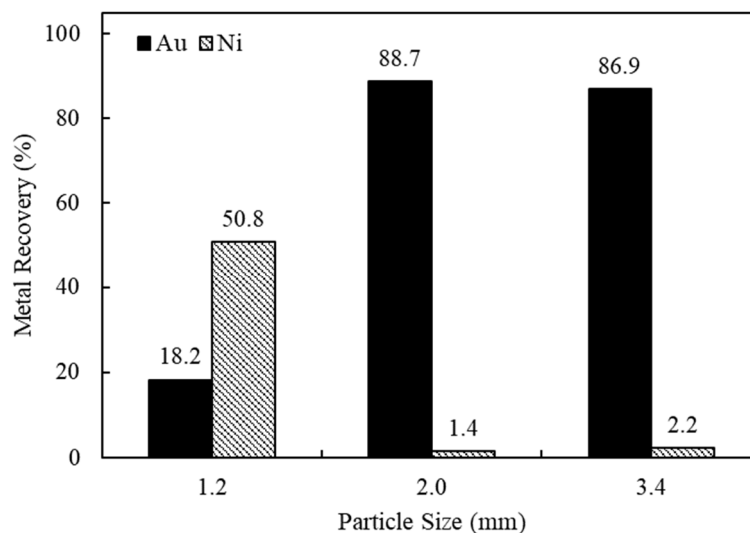

**Figure S4.** Effect of particle size on the recovery of Au and Ni at 240 min (summary of Experiment 9, 15–16).

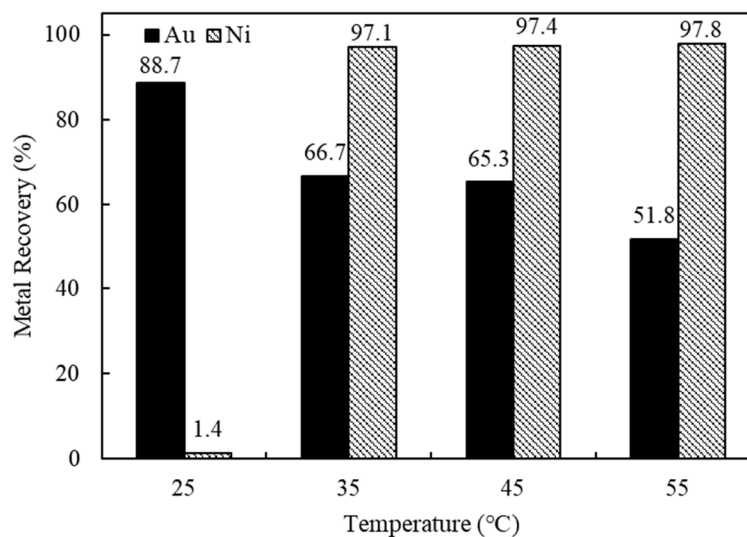

**Figure S5.** Effect of temperature on the recovery of Au and Ni at 240 min (summary of Experiment 9, 17–19).

**Table S1.** Au recovery response based on Cu(II) concentration, aeration rate, AT/AH ratio, size and temperature (summarized results from all experiments presented in this study).

| Cu(II) (mM)                                                               | Aeration (mL/min) | AT/AH ratio (M/M) | Size (mm) | Temp (°C) | Interruption Time (min) | Au Drop Degree (%) |
|---------------------------------------------------------------------------|-------------------|-------------------|-----------|-----------|-------------------------|--------------------|
| Varying Cu(II) Concentrations (25–75mM) and Aeration Rates (0–120 mL/min) |                   |                   |           |           |                         |                    |
| 25                                                                        | 0                 | 0.5/0.5           | 2         | 25        | 60–240                  | 100%               |
| 50                                                                        | 0                 | 0.5/0.5           | 2         | 25        | 60–240                  | 70%                |
| 75                                                                        | 0                 | 0.5/0.5           | 2         | 25        | 180–240                 | 35%                |
| 25                                                                        | 60                | 0.5/0.5           | 2         | 25        | 120–240                 | 90%                |
| 50                                                                        | 60                | 0.5/0.5           | 2         | 25        | >240                    | 0%                 |
| 75                                                                        | 60                | 0.5/0.5           | 2         | 25        | >240                    | 0%                 |
| 25                                                                        | 120               | 0.5/0.5           | 2         | 25        | 120–240                 | 80%                |
| 50                                                                        | 120               | 0.5/0.5           | 2         | 25        | >240                    | 0%                 |
| 75                                                                        | 120               | 0.5/0.5           | 2         | 25        | >240                    | 0%                 |

| Varying Ammonium Thiosulfate and Ammonium Hydroxide Concentration Ratio (AT/AH Ratio) |     |          |     |    |         |     |
|---------------------------------------------------------------------------------------|-----|----------|-----|----|---------|-----|
| 50                                                                                    | 120 | 0.5/0.5  | 2   | 25 | >240    | 0%  |
| 50                                                                                    | 120 | 0.5/0.75 | 2   | 25 | >240    | 0%  |
| 50                                                                                    | 120 | 0.5/1.0  | 2   | 25 | 180–240 | <5% |
| 50                                                                                    | 120 | 0.25/0.5 | 2   | 25 | >240    | 0%  |
| 50                                                                                    | 120 | 0.75/0.5 | 2   | 25 | 15–120  | 20% |
| Varying Particle Size (1.2–3.4 mm) and Temperatures (25–55 °C)                        |     |          |     |    |         |     |
| 50                                                                                    | 120 | 0.5/0.5  | 3.4 | 25 | >240    | 0%  |
| 50                                                                                    | 120 | 0.5/0.5  | 2   | 25 | >240    | 0%  |
| 50                                                                                    | 120 | 0.5/0.5  | 1.2 | 25 | 120–240 | 60% |
| 50                                                                                    | 120 | 0.5/0.5  | 2   | 35 | 30–120  | 30% |
| 50                                                                                    | 120 | 0.5/0.5  | 2   | 45 | <15     | 0%  |
| 50                                                                                    | 120 | 0.5/0.5  | 2   | 55 | <15     | 0%  |

|                   |      |         |        |        |
|-------------------|------|---------|--------|--------|
| Au Drop Degree    | 0–10 | 10–40   | 40–80  | 80–100 |
| Interruption Time | >240 | 120–240 | 30–120 | 0–30   |

**Table S2.** Table Summary of experimental variables (alternative representation of Table 3).

| Increments Variables | of | c[Cu <sup>2+</sup> ]<br>mM | Aeration<br>(21%O <sub>2</sub> )<br>mL/min | c[S <sub>2</sub> O <sub>3</sub> <sup>2-</sup> ]/c[NH <sub>3</sub> ] Ra-<br>tio<br>M/M | Particle Size<br>mm | Temperature<br>°C       |
|----------------------|----|----------------------------|--------------------------------------------|---------------------------------------------------------------------------------------|---------------------|-------------------------|
| 3                    |    | 25,<br>50,<br>75           | 0 (Ar)                                     | 0.5/0.5                                                                               | 2.0                 | 25                      |
| 3                    |    | 25,<br>50,<br>75           | 60                                         | 0.5/0.5                                                                               | 2.0                 | 25                      |
| 3                    |    | 25,<br>50,<br>75           | 120                                        | 0.5/0.5                                                                               | 2.0                 | 25                      |
| 3                    |    | 50                         | 120                                        | 0.25/0.5,<br>0.5/0.5,<br>0.75/0.5                                                     | 2.0                 | 25                      |
| 3                    |    | 50                         | 120                                        | 0.5/0.5,<br>0.5/0.75,<br>0.5/1.0                                                      | 2.0                 | 25                      |
| 3                    |    | 50                         | 120                                        | 0.5/0.5                                                                               | 3.4,<br>2.0,<br>1.2 | 25                      |
| 4                    |    | 50                         | 120                                        | 0.5/0.5                                                                               | 2.0                 | 25,<br>35,<br>45,<br>55 |

**Table S3.** Coded coefficient table obtained from Minitab factorial regression analysis for aeration rates 60 and 120 mL/min (Experiment 5–10).

| Term             | Effect | Coef  | SE Coef | T-Value | P-Value | VIF  |
|------------------|--------|-------|---------|---------|---------|------|
| Constant         |        | 107.4 | 10.5    | 10.20   | 0.009   |      |
| c[Cu2+]          | -75.7  | -37.8 | 12.9    | -2.93   | 0.099   | 1.00 |
| Aeration         | -1.6   | -0.8  | 10.5    | -0.08   | 0.946   | 1.00 |
| c[Cu2+]*Aeration | 4.0    | 2.0   | 12.9    | 0.16    | 0.891   | 1.00 |

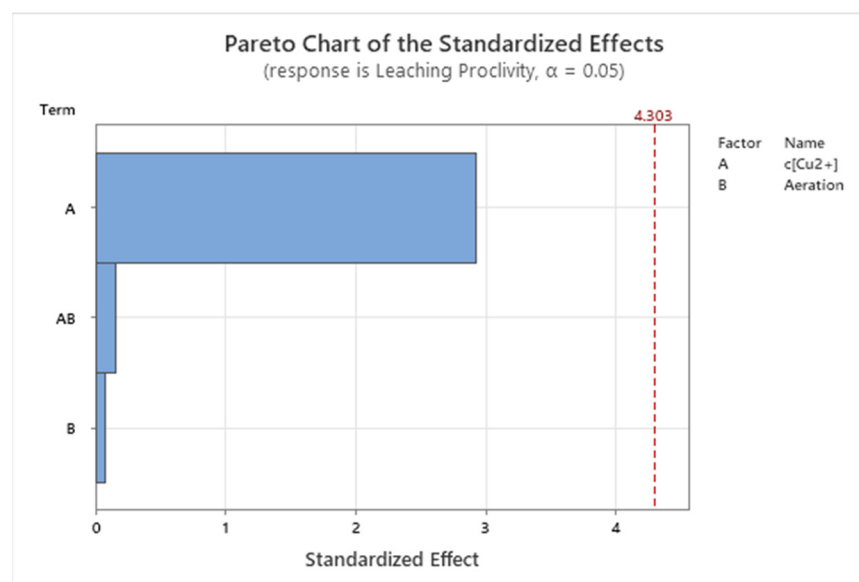

**Figure S6.** Pareto chart for the copper concentrations and aeration rates 60 and 120 mL/min (Experiment 5–10).

**Table S4.** Coded coefficient table obtained from Minitab factorial regression analysis for aeration rates 0 and 120 mL/min (Experiment 2–4 and 8–10).

| Term             | Effect  | Coef   | SE Coef | T-Value | P-Value | VIF  |
|------------------|---------|--------|---------|---------|---------|------|
| Constant         |         | 142.09 | 7.75    | 18.33   | 0.003   |      |
| c[Cu2+]          | -138.11 | -69.05 | 9.49    | -7.28   | 0.018   | 1.00 |
| Aeration         | -70.91  | -35.45 | 7.75    | -4.57   | 0.045   | 1.00 |
| c[Cu2+]*Aeration | 66.44   | 33.22  | 9.49    | 3.50    | 0.073   | 1.00 |

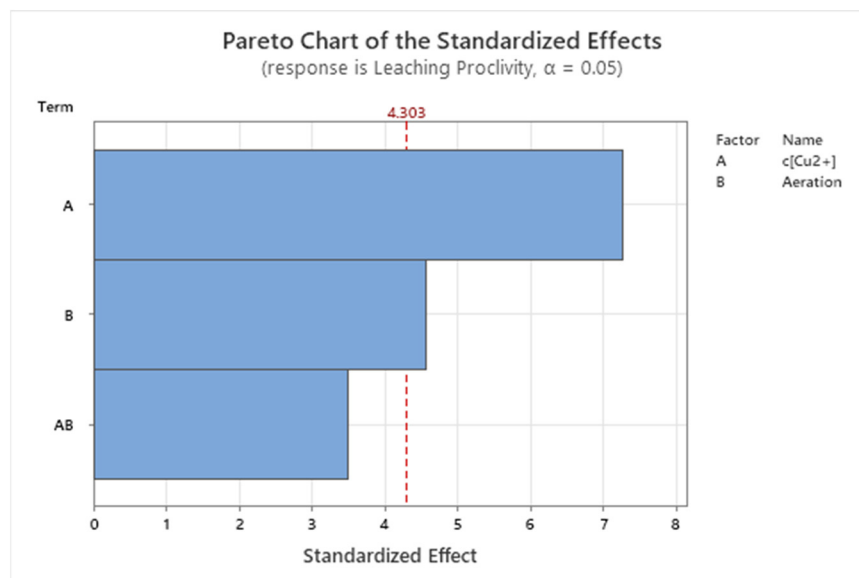

**Figure S7.** Pareto chart for the copper concentrations and aeration rates 0 and 120 mL/min (Experiment 2–4, 8–10).

**Table S5.** Analysis of variance table obtained from regression analysis in Minitab for constant thiosulfate concentration when ammonia concentration was varied (Experiment 9, 13, and 14).

| Source     | DF | SS      | MS      | F     | P     |
|------------|----|---------|---------|-------|-------|
| Regression | 1  | 380.698 | 380.698 | 27.13 | 0.121 |
| Error      | 1  | 14.034  | 14.034  |       |       |
| Total      | 2  | 394.732 |         |       |       |

**Table S6.** Analysis of variance table for varying concentration of thiosulfate while the ammonia concentration kept constant (Experiment 9, 11, and 12).

| Source     | DF | SS      | MS      | F    | P     |
|------------|----|---------|---------|------|-------|
| Regression | 1  | 2205.43 | 2205.43 | 3.03 | 0.332 |
| Error      | 1  | 727.39  | 727.39  |      |       |
| Total      | 2  | 2932.82 |         |      |       |

**Table S7.** Analysis of variance table for changing concentration of ammonia and thiosulfate (Experiment 9, 11–14).

| Source                           | DF | Adj SS | Adj MS | F-Value | P-Value |
|----------------------------------|----|--------|--------|---------|---------|
| Regression                       | 2  | 1690.7 | 845.4  | 4.32    | 0.188   |
| c[ $\text{S}_2\text{O}_3^{2-}$ ] | 1  | 966.6  | 966.6  | 4.94    | 0.156   |
| c[ $\text{NH}_3$ ]               | 1  | 724.1  | 724.1  | 3.70    | 0.194   |
| Error                            | 2  | 391.3  | 195.7  |         |         |
| Total                            | 4  | 2082.1 |        |         |         |

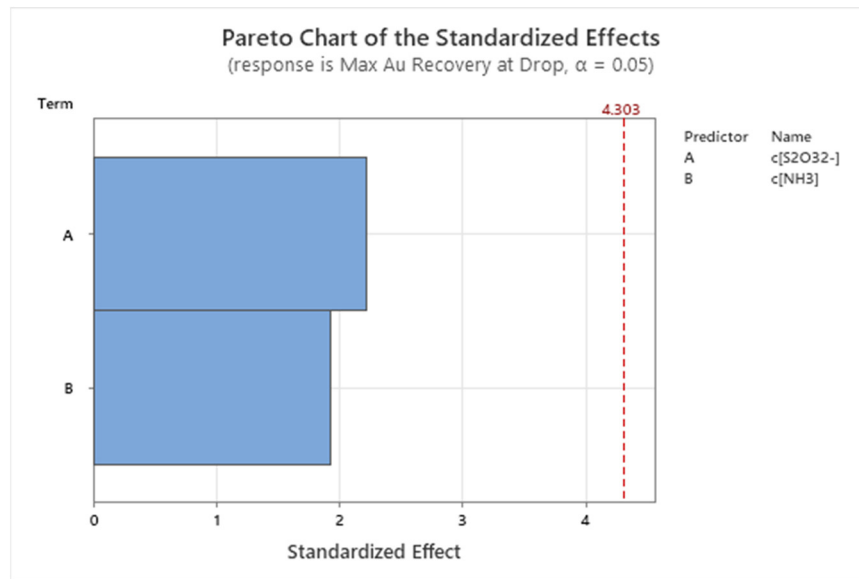

**Figure S8.** Pareto chart for varying concentrations of ammonia and thiosulfate (Experiment 9, 11–14).

**Table S8.** Coded coefficient table obtained from Minitab analysis for copper concentration, air gas flow, ammonia thiosulfate concentration, and ammonium hydroxide concentration (Experiment 2–4, 8–16).

| Term                          | Effect | Coef  | SE Coef | T-Value | P-Value | VIF  |
|-------------------------------|--------|-------|---------|---------|---------|------|
| Constant                      |        | 139.6 | 48.2    | 2.90    | 0.027   |      |
| Cu Concentration              | -138.1 | -69.1 | 45.2    | -1.53   | 0.177   | 1.00 |
| Air Gas Flow                  | -25.4  | -12.7 | 31.1    | -0.41   | 0.697   | 1.06 |
| AT Conc                       | 390.0  | 195.0 | 63.9    | 3.05    | 0.022   | 1.00 |
| AH Conc                       | -50.4  | -25.2 | 45.2    | -0.56   | 0.597   | 1.06 |
| Cu Concentration*Air Gas Flow | 66.4   | 33.2  | 45.2    | 0.74    | 0.490   | 1.00 |
